# Supplementary material
Source: PubMed Central journal article supplement (PMC4076821)
Supplement: NIHMS459769-supplement-01.pdf [file NIHMS459769-supplement-01.pdf]

**Table S1:** Range of marker values across weighted quantiles of creatinine-based estimated glomerular filtration rate (eGFR<sub>cr</sub>), cystatin C, beta trace protein, and beta 2 microglobulin

|                                                    | Q1     | Q2          | Q3        | Q4        | Q5a       | Q5b       | Q5c   |
|----------------------------------------------------|--------|-------------|-----------|-----------|-----------|-----------|-------|
| eGFR <sub>cr</sub><br>(mL/min/1.73m <sup>2</sup> ) | > 118  | 107-118     | 97-107    | 82-97     | 76-82     | 65-76     | <65   |
| Cystatin C (mg/L)                                  | < 0.69 | 0.69 - 0.75 | 0.76-0.82 | 0.83-0.92 | 0.93-0.99 | 1.00-1.11 | >1.12 |
| Beta trace protein<br>(mg/L)                       | <0.45  | 0.45 - 0.51 | 0.52-0.58 | 0.58-0.67 | 0.67-0.72 | 0.72-0.82 | >0.83 |
| Beta 2 microglobulin<br>(mg/L)                     | <1.48  | 1.49-1.66   | 1.67-1.86 | 1.87-2.20 | 2.21-2.43 | 2.44-2.85 | >2.86 |
