# Supplementary material
Source: PubMed Central journal article supplement (PMC4076821)
Supplement: NIHMS459769-supplement-02.pdf [file NIHMS459769-supplement-02.pdf]

**Table S2:** Multivariable-adjusted\* hazard ratios (95% confidence intervals) of all-cause, cardiovascular disease and coronary heart disease mortality, by quintile of kidney function marker among participants with eGFR<sub>cr</sub> ≥60mL/min/1.73m<sup>2</sup>.

|                                                                        | Quintile 1            | Quintile 2            | Quintile 3          | Quintile 4            | Quintile 5            |                       |                       |         |
|------------------------------------------------------------------------|-----------------------|-----------------------|---------------------|-----------------------|-----------------------|-----------------------|-----------------------|---------|
|                                                                        |                       |                       |                     |                       | Q5a                   | Q5b                   | Q5c                   | p-trend |
| <b>All-cause Mortality (1734 deaths /5632 participants)</b>            |                       |                       |                     |                       |                       |                       |                       |         |
| eGFR <sub>cr</sub>                                                     | 1.32<br>(0.63 - 2.77) | 0.68<br>(0.32 - 1.45) | 1.00<br>(Reference) | 0.86<br>(0.58 - 1.26) | 0.78<br>(0.50 - 1.22) | 0.77<br>(0.50 - 1.18) | 0.92<br>(0.58 - 1.46) | 0.3     |
| Cystatin C                                                             | 0.77<br>(0.44 - 1.36) | 0.81<br>(0.48 - 1.36) | 1.00<br>(Reference) | 1.00<br>(0.69 - 1.45) | 1.12<br>(0.80 - 1.57) | 1.07<br>(0.75 - 1.52) | 1.69<br>(1.24 - 2.30) | <0.001  |
| BTP                                                                    | 1.14<br>(0.68 - 1.92) | 1.24<br>(0.86 - 1.78) | 1.00<br>(Reference) | 1.02<br>(0.70 - 1.47) | 1.42<br>(0.95 - 2.15) | 1.31<br>(0.89 - 1.92) | 1.90<br>(1.39 - 2.60) | <0.001  |
| B2M                                                                    | 0.88<br>(0.53 - 1.46) | 0.95<br>(0.60 - 1.49) | 1.00<br>(Reference) | 1.22<br>(0.86 - 1.73) | 1.14<br>(0.86 - 1.51) | 1.68<br>(1.20 - 2.34) | 2.45<br>(1.80 - 3.33) | <0.001  |
| <b>Cardiovascular Disease Mortality (724 deaths/5632 participants)</b> |                       |                       |                     |                       |                       |                       |                       |         |
| eGFR <sub>cr</sub>                                                     | 0.60<br>(0.08 - 4.55) | 0.61<br>(0.14 - 2.61) | 1.00<br>(Reference) | 1.15<br>(0.52 - 2.57) | 0.88<br>(0.40 - 1.94) | 0.94<br>(0.42 - 2.12) | 1.09<br>(0.46 - 2.58) | 0.8     |
| Cystatin C                                                             | 0.27<br>(0.12 - 0.58) | 0.84<br>(0.35 - 2.06) | 1.00<br>(Reference) | 1.06<br>(0.64 - 1.76) | 1.30<br>(0.76 - 2.24) | 1.12<br>(0.63 - 1.97) | 1.62<br>(1.00 - 2.62) | 0.001   |
| BTP                                                                    | 1.17<br>(0.49 - 2.81) | 0.86<br>(0.41 - 1.81) | 1.00<br>(Reference) | 1.03<br>(0.59 - 1.79) | 1.32<br>(0.68 - 2.55) | 1.17<br>(0.65 - 2.10) | 1.90<br>(1.08 - 3.36) | 0.002   |
| B2M                                                                    | 0.88<br>(0.31 - 2.47) | 1.28<br>(0.61 - 2.65) | 1.00<br>(Reference) | 1.12<br>(0.66 - 1.90) | 1.37<br>(0.85 - 2.22) | 1.65<br>(0.93 - 2.91) | 2.08<br>(1.33 - 3.25) | 0.001   |
| <b>Coronary Heart Disease Mortality (406 deaths/5632 participants)</b> |                       |                       |                     |                       |                       |                       |                       |         |
| eGFR <sub>cr</sub>                                                     | 0.51<br>(0.04 - 5.97) | 0.87<br>(0.16 - 4.87) | 1.00<br>(Reference) | 1.07<br>(0.49 - 2.34) | 0.82<br>(0.38 - 1.78) | 0.83<br>(0.37 - 1.87) | 0.93<br>(0.39 - 2.26) | 0.8     |
| Cystatin C                                                             | 0.33<br>(0.13 - 0.81) | 1.15<br>(0.35 - 3.75) | 1.00<br>(Reference) | 1.62<br>(0.85 - 3.08) | 1.74<br>(0.96 - 3.17) | 1.33<br>(0.70 - 2.51) | 2.01<br>(0.96 - 4.18) | 0.08    |
| BTP                                                                    | 1.32<br>(0.43 - 4.03) | 1.10<br>(0.39 - 3.11) | 1.00<br>(Reference) | 1.10<br>(0.54 - 2.22) | 1.09<br>(0.50 - 2.38) | 1.27<br>(0.60 - 2.69) | 2.07<br>(0.97 - 4.39) | 0.05    |
| B2M                                                                    | 0.76<br>(0.15 - 3.81) | 1.91<br>(0.89 - 4.10) | 1.00<br>(Reference) | 1.07<br>(0.68 - 1.70) | 1.40<br>(0.84 - 2.34) | 1.54<br>(0.77 - 3.08) | 1.53<br>(0.91 - 2.58) | 0.4     |

\* Adjusted for age, sex, race, diabetes, current smoking status, systolic blood pressure, hypertension medication use, high-density lipoprotein-cholesterol, natural log(triglycerides), prevalent coronary heart disease, C-reactive protein (<0.22 mg/dL, 0.22-<1.00 mg/dL, ≥1.00 mg/dL), and natural log(urinary albumin to creatinine ratio).
